# Supplementary material for: Toward a more informative representation of the fetal–neonatal brain connectome using variational autoencoder
Source: eLife journal article supplement (doi:10.7554/elife.80878), 2023-05-15

**Supplementary File 1a.** Preprocessing steps for the DBI and dHCP datasets.


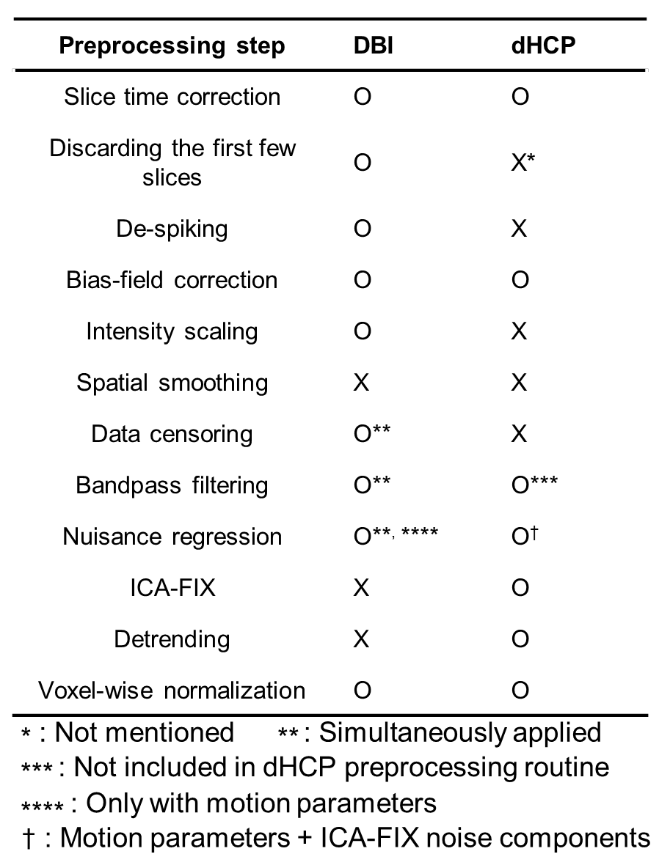


**Supplementary File 1b.** Age prediction performance in separate age groups of DBI dataset using different latent representations.


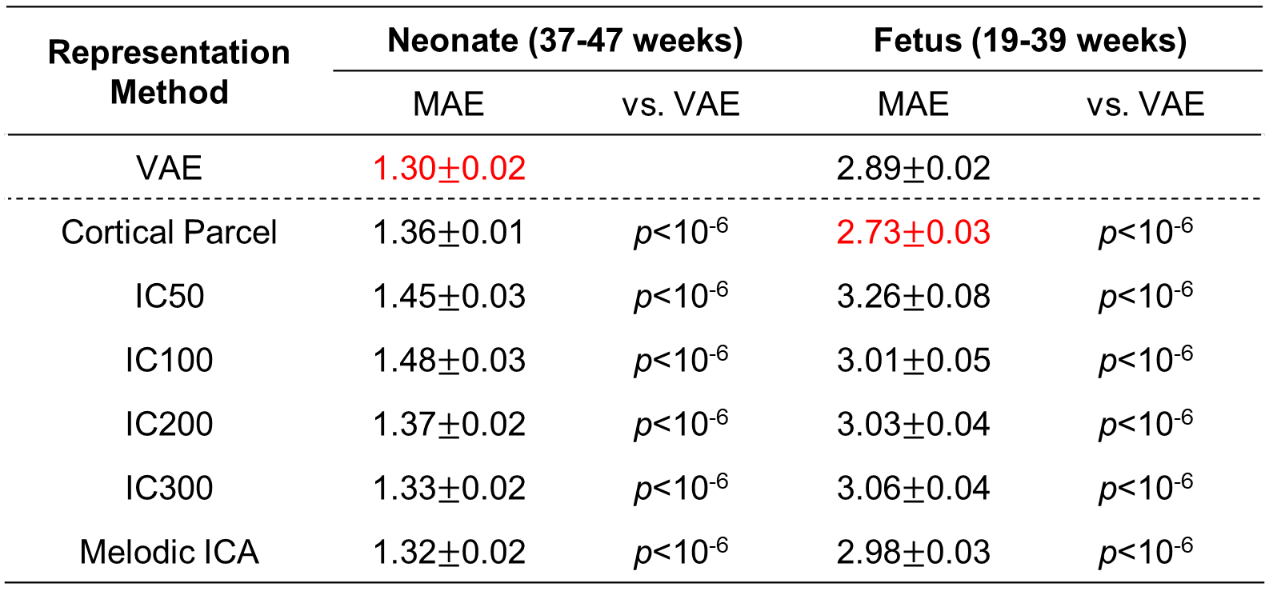

Supplement: supp [file elife_poa_e80878_Supplementary_file_1.docx]
